# Supplementary material for: The influence of hydrogen concentration in amorphous carbon films on mechanical properties and fluorine penetration: a density functional theory and ab initio molecular dynamics study
Source: Royal Society of Chemistry journal article supplement (doi:10.1039/c9ra09328a), 2020-01-01
Supplement: c9ra09328a1.pdf [file c9ra09328a1.pdf]

## Supplemental Material

# Hydrogen influence of amorphous carbon films on mechanical properties and fluorine penetration: A density functional theory and ab initio molecular dynamics study

Hwanyeol Park,<sup>1,2</sup> Daekwang Woo,<sup>2</sup> Jong Myeong Lee,<sup>2</sup> Se Jun Park,<sup>2</sup> Sungwoo Lee,<sup>1</sup> Ho Jun Kim,<sup>3</sup> Euijoon Yoon\*,<sup>1,4</sup> and Gun-Do Lee\*,<sup>1,4</sup>

<sup>1</sup>Department of Materials Science and Engineering, Seoul National University, Seoul 08826, Korea

<sup>2</sup>Memory Thin Film Technology Team, Giheung Hwaseong Complex, Samsung Electronics, 445-701, South Korea

<sup>3</sup>Department of Mechanical Engineering, Dong-A University, Busan 49315, South Korea

<sup>4</sup>Research Institute of Advanced Materials and Inter-university Semiconductor Research Center, Seoul National University, Seoul 08826, South Korea

Corresponding authors: [eyoon@snu.ac.kr](mailto:eyoon@snu.ac.kr); [gdlee@snu.ac.kr](mailto:gdlee@snu.ac.kr)

This supporting information explains the detailed methodology used to compute the elastic constants of amorphous films.

In case of crystalline systems, elastic constants can be determined by computing the energies of deformed unit cells. For cubic type phases, distortions with tetragonal and orthorhombic shear, and isotropic distortion along the three lattice vectors require three independent elastic constants  $C_{11}$ ,  $C_{12}$ , and  $C_{44}$  (all elastic constants are expressed using the Voigt notations<sup>1</sup>). For the tetragonal phases, six different deformation modes need to compute  $C_{11}$ ,  $C_{12}$ ,  $C_{13}$ ,  $C_{33}$ ,  $C_{44}$ , and  $C_{66}$ . For expansion along three high-symmetry directions, three monoclinic distortions, and three orthorhombic distortions needs to compute nine independent elastic constants.

Next, we discuss the methodology used to compute the elastic constants of amorphous alloys because the amorphous phases are isotropic. Elastic constants,  $C_{ij}$  can be obtained by computing the energies of the deformed unit cells; the deformation strain tensor,  $e_{ij}$  with six independent components is represented using Voigt notation.

$$e_{ij} = \begin{pmatrix} e_1 & e_6/2 & e_5/2 \\ e_6/2 & e_2 & e_4/2 \\ e_5/2 & e_4/2 & e_3 \end{pmatrix}$$

In order to obtain three independent elastic constants  $C_{11}$ ,  $C_{12}$ , and  $C_{44}$  for cubic structure, orthorhombic, isotropic and monoclinic distortions are applied.

The total energy change related to the strain tensor gives

$$E(V, e_{ij}) = E_0 + V \sum_{ij} \sigma_{ij} e_{ij} + \frac{V}{2} \sum_{ijkl} C_{ijkl} e_{ij} e_{kl} + O[e_{ij}^3]$$

where  $E_0$  and  $E(e_{ij})$  are the internal energies of the initial and the strained lattice, respectively;  $V$  is the volume of the unstrained lattice;  $\sigma_{ij}$  is the stress;  $O(e_{ij}^3)$  indicates the neglected terms in the polynomial expansion. The Elastic stiffness tensors are calculated by the computation of the derivatives of the total energy respect to the applied strain.

$$C_{ijkl} = \frac{1}{V} \left[ \frac{\partial^2 E(V, e)}{\partial e_{ij} \partial e_{kl}} \right]_{e=0}$$

Once the stiffness tensor,  $C_{ijkl}$ , are obtained, elastic properties such as poisson's ratio, Young's, bulk, and shear moduli can be calculated by using Voight-Reuss-Hill approximation.<sup>2</sup>

$$K = (K_V + K_R)/2$$

$$K_V = \frac{1}{9}(C_{11} + C_{22} + C_{33}) + \frac{2}{9}(C_{12} + C_{13} + C_{23})$$

$$K_R = \frac{1}{(S_{11} + S_{22} + S_{33}) + 2(S_{12} + S_{13} + S_{23})}$$

## References

1. Leuken, H. v.; de Wijs, G. A.; van der Lugt, W.; Groot, R. A. d., *Physical Review B* **1996**, 53 (16), 10599-10604
2. Chung, D. H.; Buessem, W. R., *Journal of Applied Physics* **1968**, 39 (6), 2777-2782
